# Supplementary material for: Tuning humidity sensing properties via grafting fluorine and nitrogen-containing species on single-walled carbon nanotubes
Source: Royal Society of Chemistry journal article supplement (doi:10.1039/d3cp01550e), 2023-01-01
Supplement: d3cp01550e1.pdf [file d3cp01550e1.pdf]

## Supplementary Materials

# Tuning humidity sensing properties via grafting fluorine and nitrogen-containing species on single- walled carbon nanotubes

Vitalii I. Sysoev<sup>a, \*</sup>, Olga A. Gurova<sup>a</sup>, Yuliya V. Fedoseeva<sup>a</sup>, Artem V. Gusel'nikov<sup>a</sup>, Anna A. Makarova<sup>b</sup>, Alexander V. Okotrub<sup>a</sup> and Lyubov G. Bulusheva<sup>a</sup>

<sup>a</sup>Nikolaev Institute of Inorganic Chemistry, Siberian Branch of Russian Academy of Sciences, 3 Acad. Lavrentiev ave., Novosibirsk 630090, Russia

<sup>b</sup>Physical Chemistry, Institute of Chemistry and Biochemistry, Free University of Berlin, Arnimallee 22, 14195 Berlin, Germany

\*corresponding author: [sysoev@niic.nsc.ru](mailto:sysoev@niic.nsc.ru)

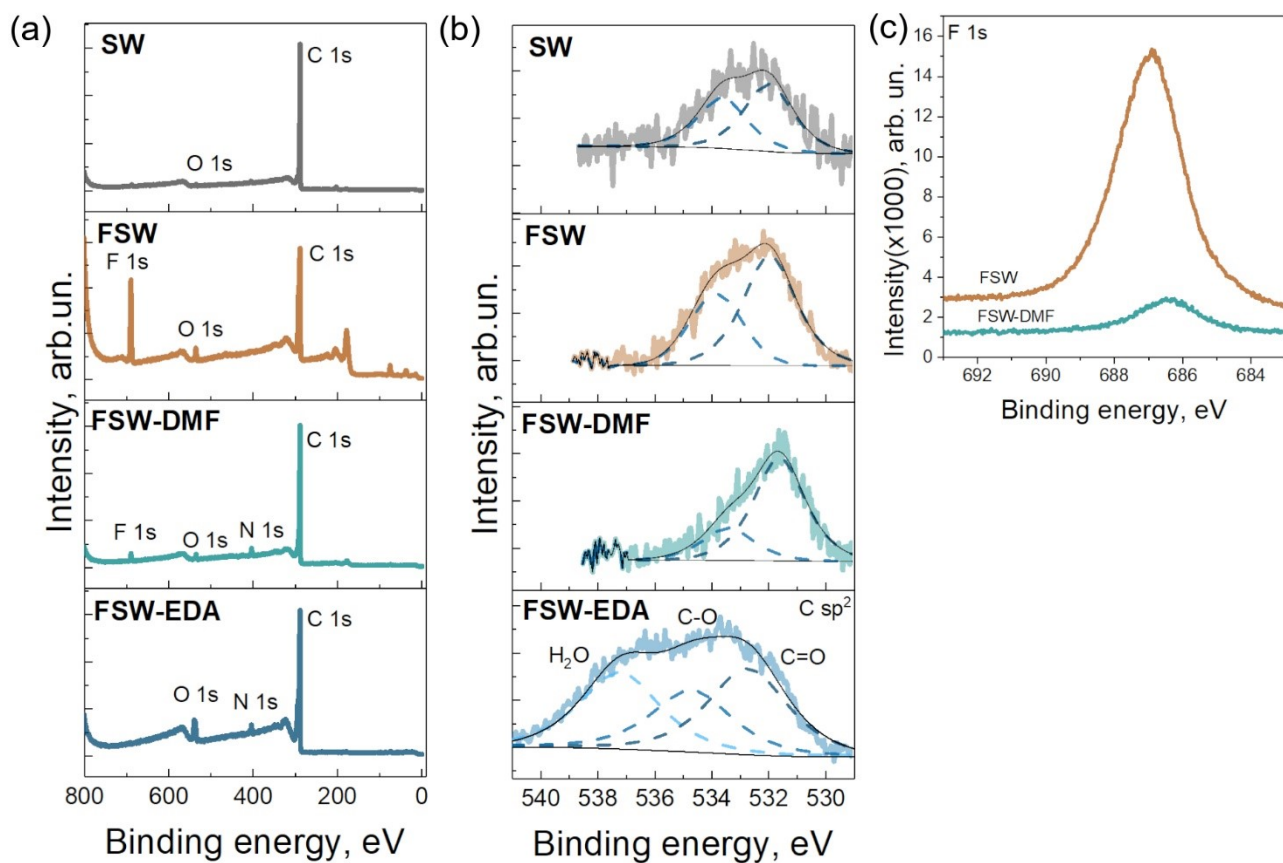

**Figure S1.** XPS (a) survey spectra and (b) O 1s spectra of initial (SW) and chemically modified SWCNTs and (c) F 1s spectra of fluorinated SWCNTs (FSW) and those treated with DMF.

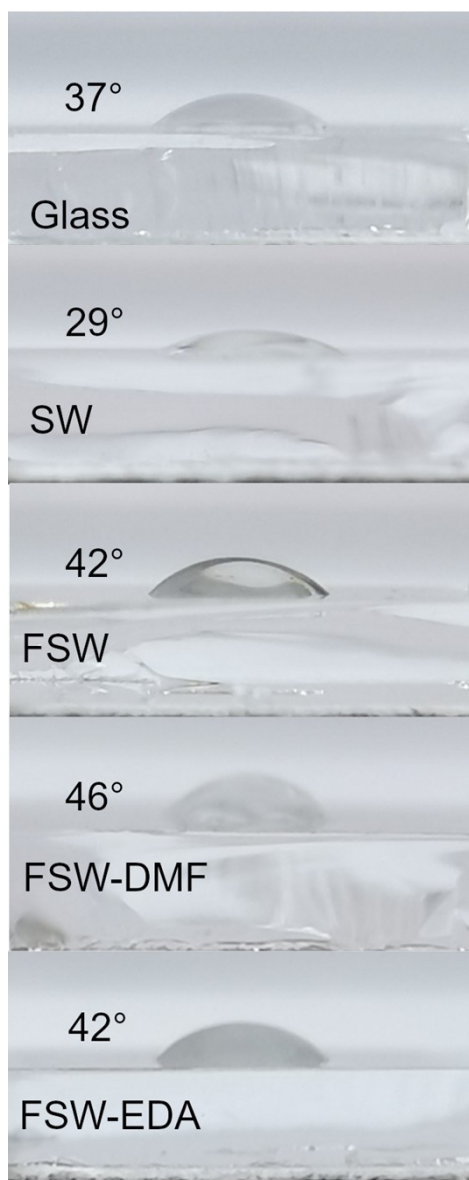

**Figure S2.** Contact angle measured at the interface between a water drop and the surface of glass substrate, SW film, FSW film, FSW-DMF film, and FSW-EDA film 120 s after droplet application.

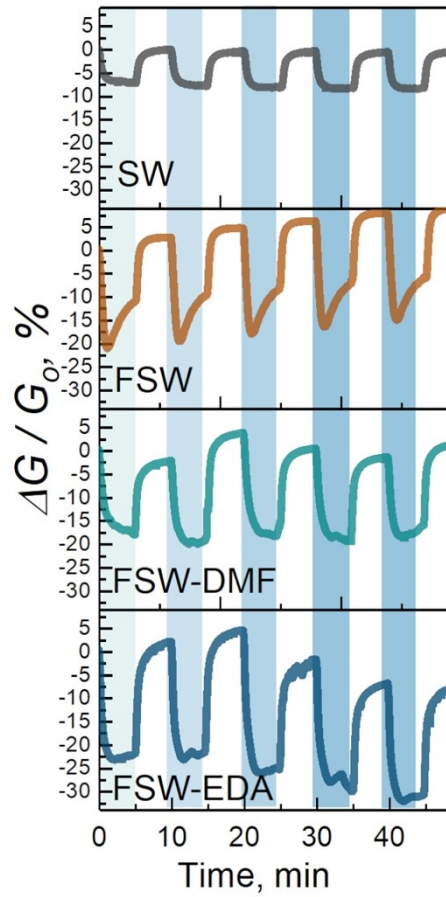

**Figure S3.** Run-to-run tests of the sensors to humid air (RH=100%, light strip) and dry air (RH=0%, dark strip) at room temperature after initial saturation of sensor in humid atmosphere.

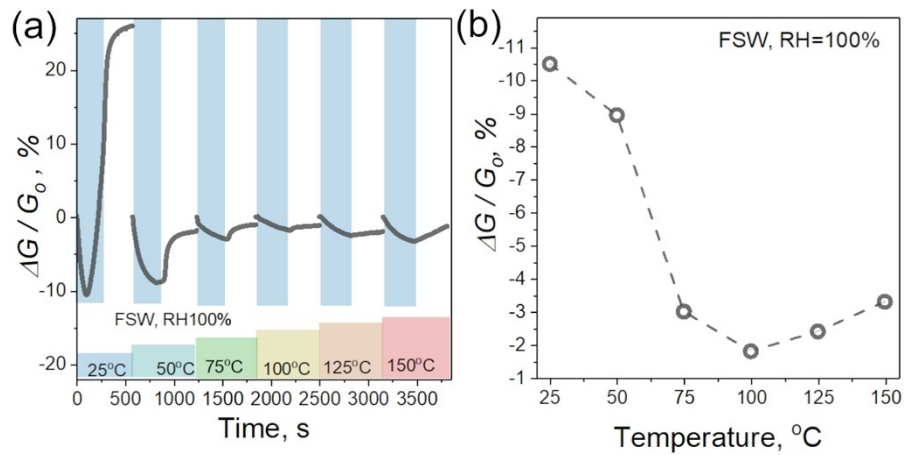

**Figure S4.** (a) Experimental curves of sensor response at different operation temperatures and (b)  $\Delta G / G_0$  vs temperature of FSW sensor exposed to 100% RH.

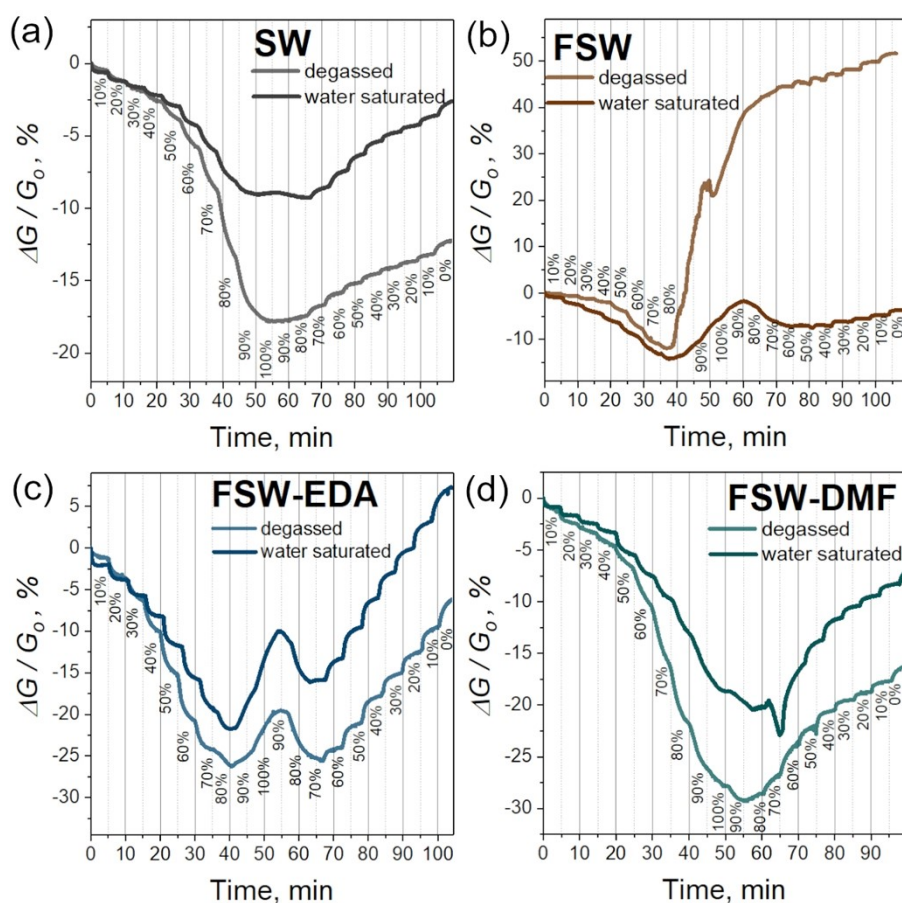

**Figure S5.** Dynamic response of (a) SW, (b) FSW, (c) FSW-EDA and (d) FSW-DMF sensors to the presence of water in air with an increase in RH from 10% to 100% and a decrease in RH from 100% to 0%. Degassed sensors are films annealed at 150 °C in argon; water-saturated sensors are obtained after testing the films at 100% RH followed by treatment with dry air at room temperature.
